# Supplementary material for: A facile route for preparation of monodisperse nanoparticles of one-dimensional Fe(ii)-4-amino-1,2,4-triazole coordination polymers with hysteretic spin-crossover near room temperature
Source: Royal Society of Chemistry journal article supplement (doi:10.1039/c4ra07565j), 2014-01-01
Supplement: c4ra07565j1.pdf [file c4ra07565j1.pdf]

**A facile route for preparation of monodisperse nanoparticles of one-dimensional Fe(II)-4-amino-1, 2, 4-triazole coordination polymer with hysteretic spin-crossover near room temperature**

Meng-Ya Chen,<sup>a</sup> Xuan-Rong Chen,<sup>a</sup> Wei-Hua Ning,<sup>a</sup> Xiao-Ming Ren\*<sup>a, b, c</sup>

<sup>a</sup>State Key Laboratory of Material-Oriented Chemical Engineering and College of Science, Nanjing Tech University, Nanjing 210009, P.R. China

<sup>b</sup>College of Materials Science and Engineering, Nanjing Tech University, Nanjing 210009, P.R. China

<sup>c</sup>State Key Laboratory of Coordination Chemistry, Nanjing University, Nanjing 210093, P. R. China

Tel.: +86 25 58139476

Fax: +86 25 58139481

E-mail: [xmren@njtech.edu.cn](mailto:xmren@njtech.edu.cn)

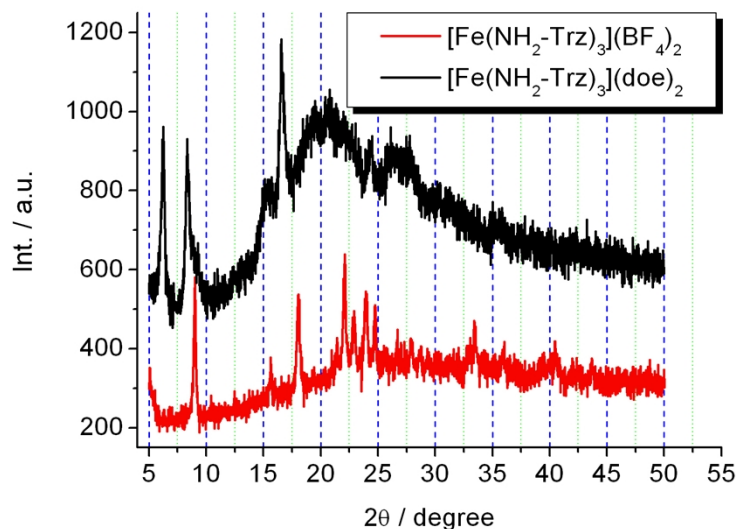

Figure S1 PXRD patterns of  $[\text{Fe}(\text{NH}_2\text{-Trz})_3](\text{doe})_2$  and  $[\text{Fe}(\text{NH}_2\text{-Trz})_3](\text{BF}_4)_2$  at ambient temperature.

Powder X-ray diffraction (PXRD) data were collected on a Bruker D8 Advance powder diffractometer, operating at 40 kV and 40 mA using  $\text{Cu K}\alpha$  radiation with  $\lambda = 1.5418 \text{ \AA}$ . Samples were scanned from  $2\theta = 5\text{--}50^\circ$  with  $0.02^\circ/\text{step}$  and  $1.2 \text{ s/step}$ .

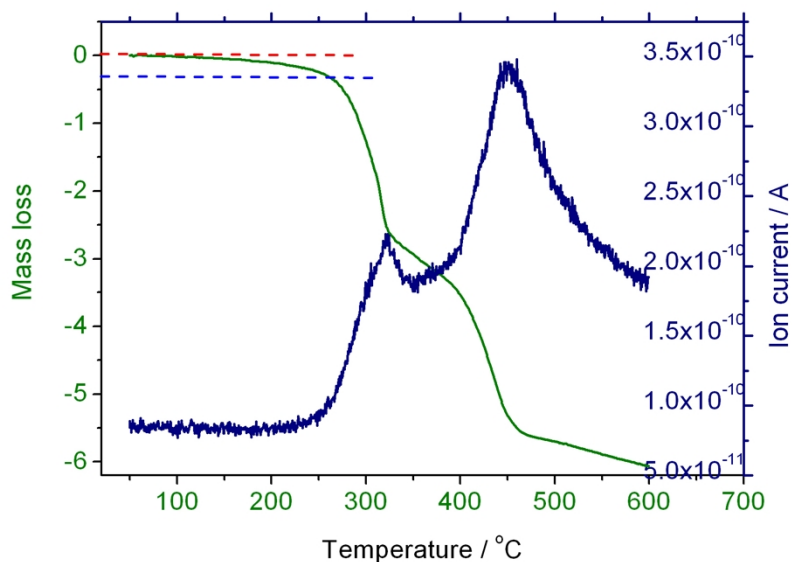

Figure S2 TG and ion current plots of  $[\text{Fe}(\text{NH}_2\text{-Trz})_3](\text{doe})_2$  (compound **1**) obtained from TGA-Mass measurement.

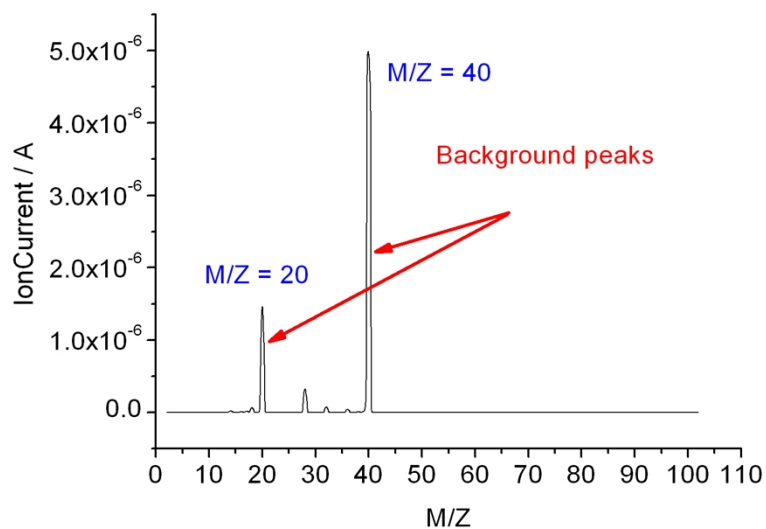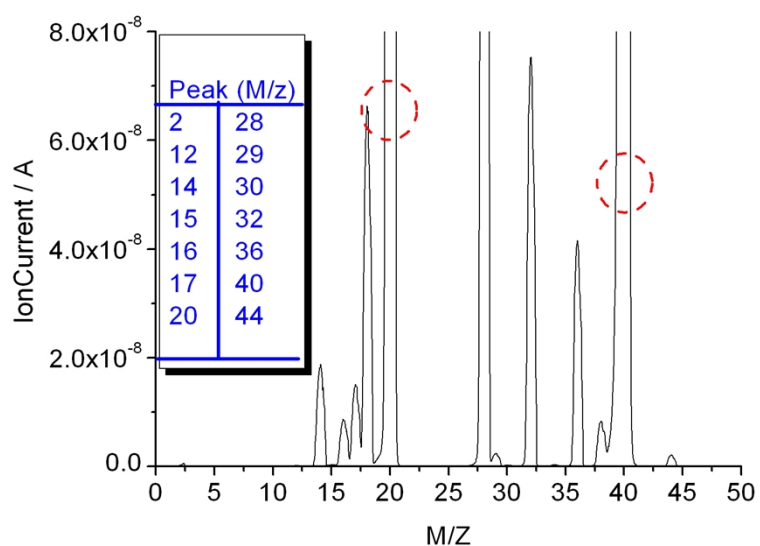

Figure S3 TGA-MASS spectra where M/Z = 20 and 40 arising from the background and others from the sample. M/Z = 32 attributed from MeOH, M/Z = 15 (CH<sub>3</sub>), 17 (OH) and the peak of H<sub>2</sub>O at M/Z = 20 is probably overlapped with the background.

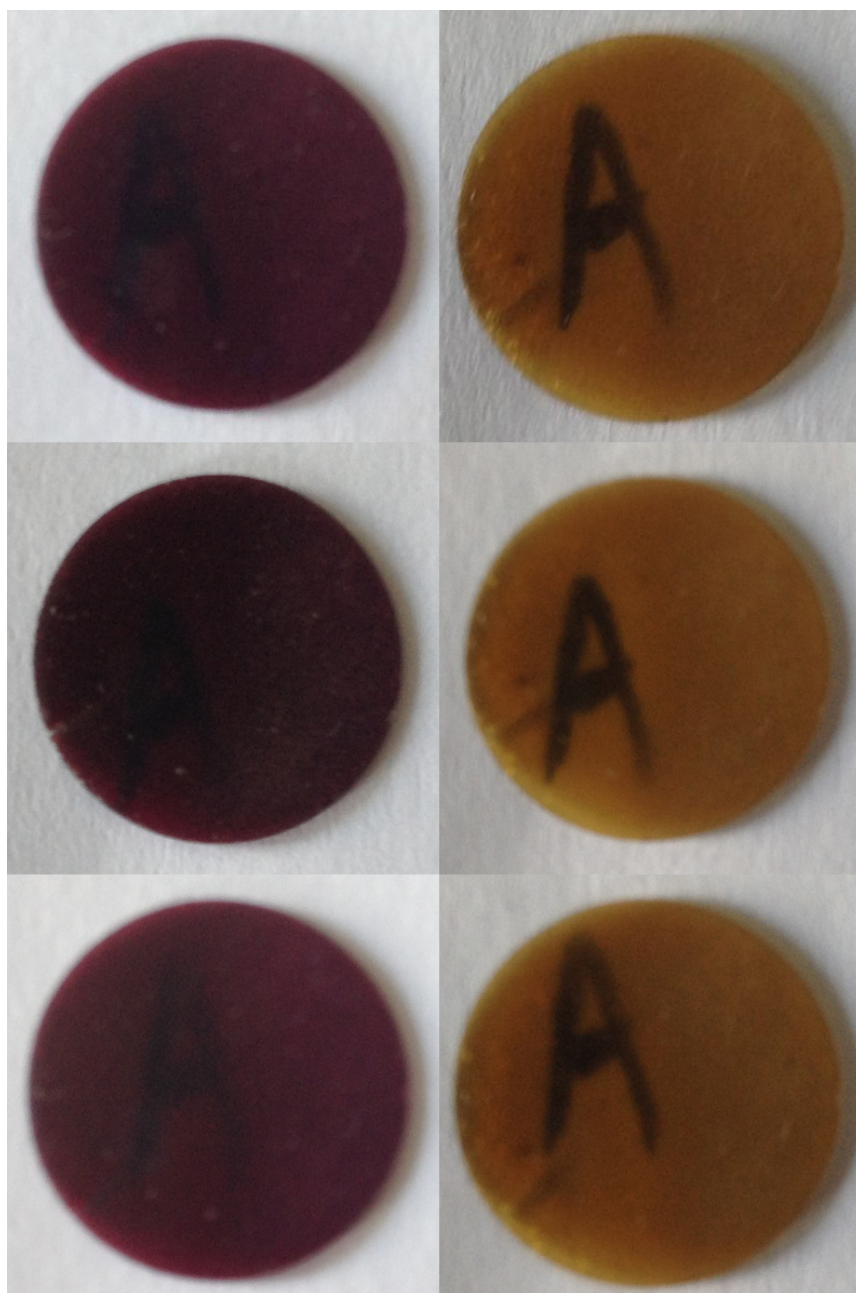

Figure S4 Photos of the disc of 1 in LS and HS states (a-f) under three heating-cooling cycles, which show the color of the disc to be almost the same.

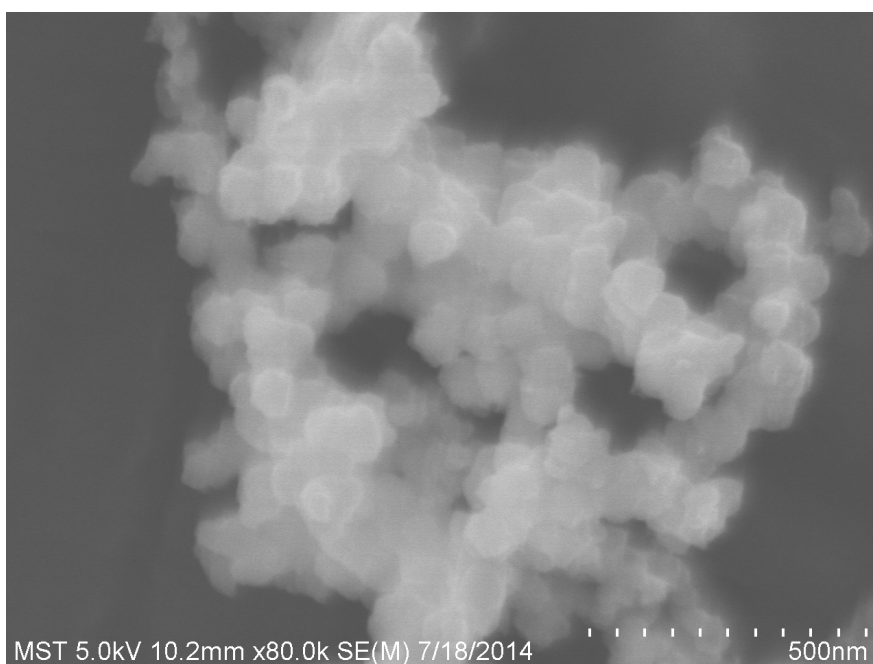

Figure S5a The molar ratios of reactants is  $\text{Fe}(\text{BF}_4)_2 \cdot 6\text{H}_2\text{O}$ : sodium dodecyl sulfonate: 4-amino-1, 2, 4-triazole = 1:3:2 at ambient temperature for 1 h; and the power of ultrasonic wave is 200 W.

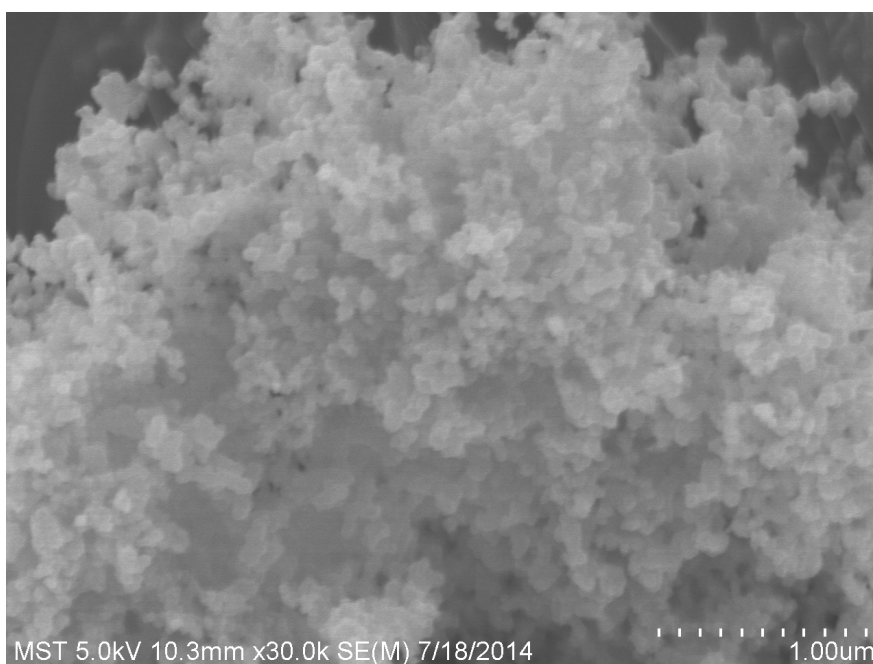

Figure S5b The molar ratios of reactants is  $\text{Fe}(\text{BF}_4)_2 \cdot 6\text{H}_2\text{O}$ : sodium dodecyl sulfonate: 4-amino-1, 2, 4-triazole = 1:3:2 at ambient temperature for 2 h; and the power of ultrasonic wave is 200 W.

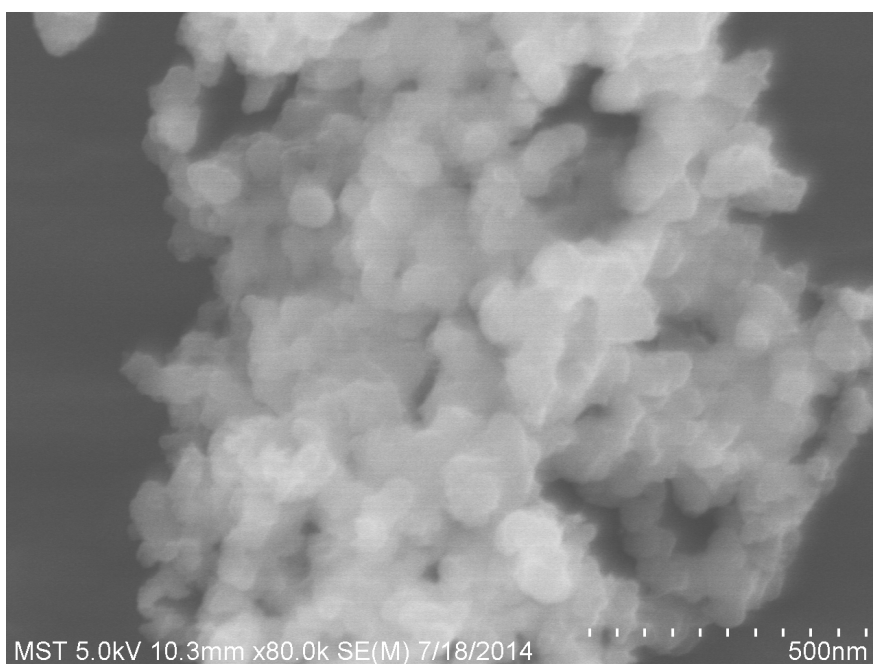

Figure 5c The molar ratios of reactants is  $\text{Fe}(\text{BF}_4)_2 \cdot 6\text{H}_2\text{O}$ : sodium dodecyl sulfonate: 4-amino-1, 2, 4-triazole = 1:3:3 at ambient temperature for 2 h; and the power of ultrasonic wave is 200 W.

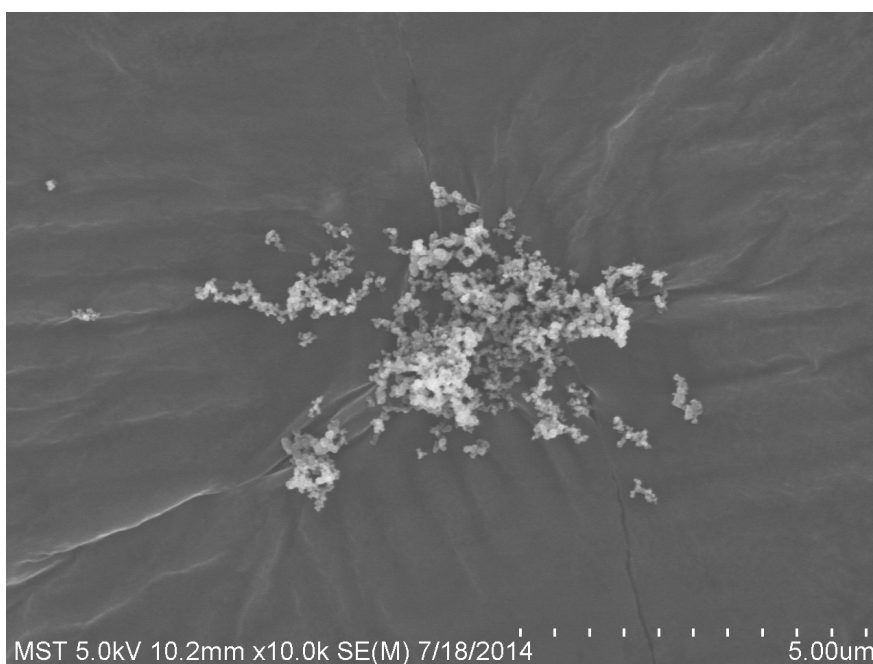

Figure S5d The molar ratios of reactants is  $\text{Fe}(\text{BF}_4)_2 \cdot 6\text{H}_2\text{O}$ : sodium dodecyl sulfonate: 4-amino-1, 2, 4-triazole = 1:3:4 at ambient temperature for 2 h; and the power of ultrasonic wave is 200 W.

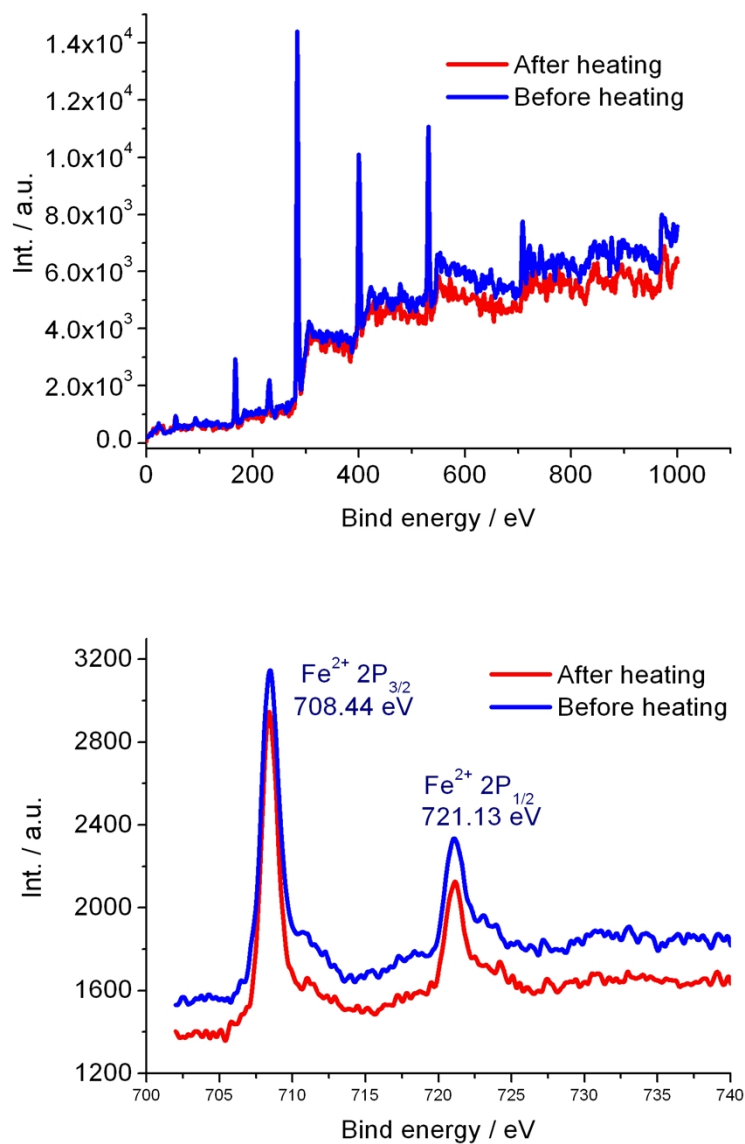

Figure S6 XPS spectra of **1** (the blue line represents the sample which had not be heated, and the red line is the sample which was heated/cooled in LS and HS states for three cycles).
